# Supplementary material
Source: PubMed Central journal article supplement (PMC4634008)
Supplement: NIHMS733201-supplement-Supp_TableS1-S3___FigureS1-S5.pdf [file NIHMS733201-supplement-Supp_TableS1-S3___FigureS1-S5.pdf]

## Supporting Information

Table S1. Muropeptide composition<sup>a</sup> of PG from *V. cholerae* LMW PBP mutants

|                      | wt    | $\Delta dacA-1$ | $\Delta dacA-2$ | $\Delta dacB$ | $\Delta pbpG$ | $\Delta A2\Delta G$ | $\Delta B\Delta G$ | $\Delta 3$ |
|----------------------|-------|-----------------|-----------------|---------------|---------------|---------------------|--------------------|------------|
| Monomers             | 40.62 | 55.19           | 43.40           | 44.97         | 43.27         | 40.33               | 39.12              | 43.97      |
| Dimers               | 26.10 | 21.12           | 25.36           | 24.24         | 24.96         | 26.59               | 26.04              | 24.43      |
| Trimers              | 2.39  | 0.86            | 1.96            | 2.18          | 2.27          | 2.16                | 2.93               | 2.39       |
| Tripeptides          | 5.78  | 2.71            | 3.80            | 6.06          | 5.12          | 4.66                | 3.85               | 4.76       |
| Tetrapeptides        | 60.31 | 56.00           | 62.26           | 60.95         | 62.28         | 61.18               | 59.66              | 59.39      |
| Pentapeptides        | 2.52  | 17.83           | 3.50            | 3.60          | 2.58          | 2.83                | 3.54               | 5.37       |
| Anhydro peptides     | 10.38 | 6.35            | 10.20           | 12.28         | 10.13         | 9.83                | 14.14              | 11.59      |
| Average chain length | 9.64  | 15.74           | 9.80            | 8.14          | 9.87          | 10.17               | 7.07               | 8.63       |
| Crosslink            | 27.30 | 21.55           | 26.34           | 25.33         | 26.10         | 27.68               | 27.51              | 25.63      |
| LD-crosslink         | 1.57  | 0.71            | 1.68            | 1.46          | 1.96          | 1.60                | 1.23               | 1.21       |
| DD-crosslink         | 25.73 | 20.84           | 24.66           | 23.87         | 24.14         | 26.07               | 26.28              | 24.41      |

<sup>a</sup> Relative amounts of muropeptides were calculated as described by Glauner (Glauner, 1988). The values are the means of two independent experiments.

Table S2. Strains used in this study

| Strain name                       | Strain # | genotype/description                                                      | reference/source          |
|-----------------------------------|----------|---------------------------------------------------------------------------|---------------------------|
| C6706                             |          | <i>V. cholerae</i> wild-type strain C6706 El Tor                          | (Thelin and Taylor, 1996) |
| C6706 <i>lacZ</i> -               |          | <i>lacZ</i> -negative derivative of C6706                                 | (Cameron et al., 2008)    |
| <i>E. coli</i> DH5α λpir          |          | cloning strain                                                            | (Kolter et al., 1978)     |
| <i>E. coli</i> SM10 λpir          |          | conjugation strain                                                        | (Simon et al., 1983)      |
| <i>E. coli</i> MFD pir            |          | DAP auxotroph conjugation strain                                          | (Ferrieres et al., 2010)  |
| <i>ΔdacA-1</i>                    | AM647    | C6706 $\Delta$ VCA0947                                                    | This work                 |
| <i>ΔdacB</i>                      | AM698    | C6706 $\Delta$ VCA0632                                                    | This work                 |
| <i>ΔpbpG</i>                      | AM715    | C6706 $\Delta$ VCA0870                                                    | This work                 |
| <i>ΔdacA-2 dacA-1</i> cond        | AM735    | N16961 $\Delta$ VCA0270 P <sub>VCA0947P</sub> ::P <sub>BAD</sub> :VCA0947 | This work                 |
| <i>dacA-1</i> cond                | AM738    | C6706 P <sub>VCA0270P</sub> ::P <sub>BAD</sub> :VCA0270                   | This work                 |
| <i>ΔdacA-1 dacA-2</i> cond        | AM740    | C6706 $\Delta$ VCA0947 P <sub>VCA0270</sub> ::P <sub>BAD</sub> :VCA0270   | This work                 |
| <i>ΔdacB ΔpbpG</i>                | AM770    | C6706 $\Delta$ VCA0632 $\Delta$ VCA0870                                   | This work                 |
| <i>ΔdacB ΔpbpG ΔdacA-2 aka Δ3</i> | AM783    | C6706 $\Delta$ VCA0632 $\Delta$ VCA0870 $\Delta$ VCA0270                  | This work                 |
| <i>dacA-2P-lacZ</i>               | AM817    | C6706 <i>lacZ</i> - P <sub>VCA0270P</sub> : <i>lacZ</i> <sub>EC</sub>     | This work                 |
| <i>dacA-1P-lacZ</i>               | AM818    | C6706 <i>lacZ</i> - P <sub>VCA0947P</sub> : <i>lacZ</i> <sub>EC</sub>     | This work                 |
| <i>ΔdacA-2</i>                    | AM1065   | C6706 $\Delta$ VCA0270                                                    | This work                 |

Table S3. Plasmids used in this study

| Plasmid   | description                                                                                                                         | reference/source        |
|-----------|-------------------------------------------------------------------------------------------------------------------------------------|-------------------------|
| pDS132    | <i>sacB</i> -containing suicide vector for double homologous recombination, <i>camR</i>                                             | (Philippe et al., 2004) |
| pBAD18kan | replicating plasmid used for expressing constructs under control of the arabinose-inducible P <sub>BAD</sub> promoter, <i>kanR</i>  | (Guzman et al., 1995)   |
| pAM224    | integrating plasmid, R6K, <i>kanR</i>                                                                                               | This work               |
| pAM233    | pDS132::VC0947 flanking regions                                                                                                     | This work               |
| pAM270    | pDS132::VCA0270 flanking regions                                                                                                    | This work               |
| pAM290    | pDS132::VC0632 flanking regions                                                                                                     | This work               |
| pAM291    | pDS132::VCA0870 flanking regions                                                                                                    | This work               |
| pAM298    | pAM299-derived plasmid to generate P <sub><i>dacA-2</i></sub> ::P <sub>BAD</sub> : <i>dacA-2</i>                                    | This work               |
| pAM299    | pAM224-derived integrating plasmid containing pBAD, <i>kanR</i>                                                                     | This work               |
| pAM312    | pAM299-derived plasmid to generate P <sub><i>dacA-1</i></sub> ::P <sub>BAD</sub> : <i>dacA-1</i>                                    | This work               |
| pAM325    | pAM224-derived integrating plasmid containing <i>lacZ<sub>EC</sub></i> , <i>kanR</i>                                                | This work               |
| pAM326    | pAM325-derived plasmid to generate P <sub><i>dacA-1</i></sub> ::P <sub><i>dacA-1</i></sub> : <i>lacZ<sub>EC</sub></i> (merodiploid) | This work               |
| pAM327    | pAM325-derived plasmid to generate P <sub><i>dacA-2</i></sub> ::P <sub><i>dacA-2</i></sub> : <i>lacZ<sub>EC</sub></i> (merodiploid) | This work               |
| pAM332    | pBAD18kan::VC0947                                                                                                                   | This work               |
| pAM333    | pBAD18kan::VCA0270                                                                                                                  | This work               |

## Supplementary Fig legends

**Fig. S1.** Alignment of *V. cholerae* *dacA-1* and *dacA-2* and *E. coli* *dacA* protein sequences. Active site residues are shaded in light red.

**Fig. S2.** A. Growth of  $\Delta$ *dacA-1* and wild type *V. cholerae* in M9 medium. B. Comparison of CFU/ml (based on plating on LBSF agar) and OD600 during growth of  $\Delta$ *dacA-1* and wild type cells. Note the different scale bars. C. Phase contrast images of  $\Delta$ *dacA-1* cells from different culture densities. D. Growth of  $\Delta$ *dacA-1* complemented by *DacA-2* overproduction. Shown is the growth of wild-type cells in LB medium, and  $\Delta$ *dacA-1* cells expressing ectopic *dacA-2* under control of the  $P_{BAD}$  promoter grown in LB and LB supplemented with 0.4% arabinose.

**Fig. S3.** Comparisons of PG composition for *V. cholerae* LMW PBP mutants. The relative molar abundance of total M5 monomers and D45 dimers (A), total tripeptides (B), and total anhydro muropeptides (C) are shown. Stars indicate statistically significant differences based on unpaired t-test (\* $p \leq 0.1$ , \*\* $p \leq 0.01$ , \*\*\* $p \leq 0.001$ ).

**Fig. S4.** TnSeq analysis shows that *dacA-1* is not essential in salt free LB. Red and green vertical bars show the relative abundance in TnSeq data of reads corresponding to forward and reverse strand insertions within the indicated genes. Reads are shown for *V. cholerae* libraries culture in LBSF or in LB. Black lines (TA sites) show all possible transposon insertion sites.

**Fig. S5. A.** Growth curves of wild type and  $\Delta dacA-1$  strains grown in salt-free LB (LBSF), then transferred LBSF or LB containing 500 mM NaCl (LBHS). **B.** Phase contrast images of  $\Delta dacA-2 dacA-1$  cond grown with and without inducer in salt-free LB medium.

```

-----|-----|-----|-----|-----|-----|-----|-----|-----|-----|-----|
      10      20      30      40      50      60      70      80      90     100
Fbp5 BCK12 MNTIPKARIM KRLALTTALC TAPISAARAH DINIKTIMDG VQIDAREYI LISYNEGHWL ARQNAIVRRD PASLRECMTE YVIGQAMEAG KFKETDLVTI
VC_0947/DacA-1 ----MKKSL KEVLASSTL SITLSTKAPA EP---IVTDF AQQIAAGYV IMNYHEGHWL AHRKMDTKLR PASLRECMTE YVIGQAVRRG NISLNDQVVI
VC_A0270/DacA-2 -----MTET KFLVREEMAC MAPVETLQPS AL---TVVDF DQQLAANGYV LISPHYKHWL VRRNAHQKLN PASLRECMTE YVAGQEMERG NIBASQVRI
Consensus      K          D  Q  A  Y  L  E  GHWL  E          PASLRE MTE YV QQ  K  G          D  V  I

```

```

-----|-----|-----|-----|-----|-----|-----|-----|-----|-----|-----|
      110     120     130     140     150     160     170     180     190     200
Fbp5 BCK12 GNDKAWATND VPKESSEMPF KPCMQVPSQ LIRGINDQES NDACVAMADP AGSQDAPVC IMNSYVNAE LKNTHPQTVR GHDADQYES ARDMALGQA
VC_0947/DacA-1 SKNAKAKN-- -FDSEEMPFV EYGVTVVEVS LNRGIIIQES NDACVAMAEH VAGTEDAPVD IMNAAASRE KNSHPFNSR GLDDPNLYST FYDLALGQA
VC_A0270/DacA-2 SNAKAKK-- -FDSEEMPI EYGVTVNLMS LYRGLIVQES NDASVAIAEH VAGEGAPVS IMNEMAQQLG MNNSSPANTP GLDNDALYST FYDIALGQA
Consensus      AKA      F  ES  MP  G  V  L  RC  QES  NDA  VA  A  AG  APV  LMN  LE  N  F  E  GLD  YE  D  AL  G  A

```

```

-----|-----|-----|-----|-----|-----|-----|-----|-----|-----|-----|
      210     220     230     240     250     260     270     280     290     300
Fbp5 BCK12 LIRNVPNHYS IYERREPTFN GTRQLNENGL LWNELNVDG IKRHTDQAG YNLVAEATG QMRISNVMG GRTPGGRAR SKRLTWGRF FFRVNFLEY
VC_0947/DacA-1 LIRNVPNHYS IYERREPTFN GTRQLNENGL LWNELNVDG IKRHTDQAG YNLVAEATG EMRLVAVMG TGNNAKAR SKRLTWGRF FFRVNFLEY
VC_A0270/DacA-2 LIRNVPHIYD IYERREPTFN GTRQLNENGL LWNELNVDG MKRHTDQAG YNLVAEATG EMRLVAVMG SKRVSRRR SKRLTWGRF FFRVNFLEY
Consensus      IR  P  Y  Y  E  FT  N  GI  Q  NENGL  L  D  E  NVDG  KTR  T  AG  Y  L  SAT  G  MRL  VMG          E  AR  SK  LL  GFR  F  RTV  P

```

```

-----|-----|-----|-----|-----|-----|-----|-----|-----|-----|-----|
      310     320     330     340     350     360     370     380     390     400
Fbp5 BCK12 GRKFAHPVW FGDHRASLG VDKSVYLTID RGRMEDKAE YVNSERLHA FLQKNQVGT INPQLGKTI EQPLAVLQE IPRGNFFGI IDYIKMPFH
VC_0947/DacA-1 GRTVNETIW MGRKDTIAGL VDKSVYVTLQ EGQAKDTAS FVLRKQ-LEA FLKRGDIVGT IYVQLAGNDI AQPLAALHD VQCELFERL WDEYVLLPKE
VC_A0270/DacA-2 DVIQNGSLW YGRNRYVALG SADVYVTLQD SEDVKKINAV IQLDQN-LEA FLKRGDIVGT IYVTDIKRV GRKRVGQRE VQCCIFERL MDEYVLLPKE
Consensus      W  GD  LG  Y  T  F  R  K  L  A  L  L  A  P  K  VC          L          G  F  D  L  F

```

```

---
Fbp5 BCK12 WFC
VC_0947/DacA-1 WF
VC_A0270/DacA-2 WF
Consensus WF

```

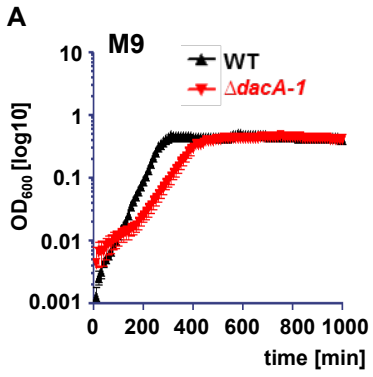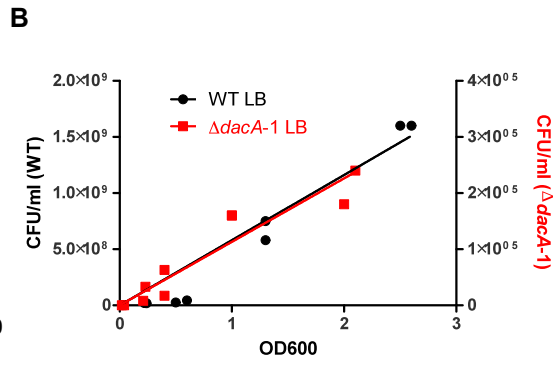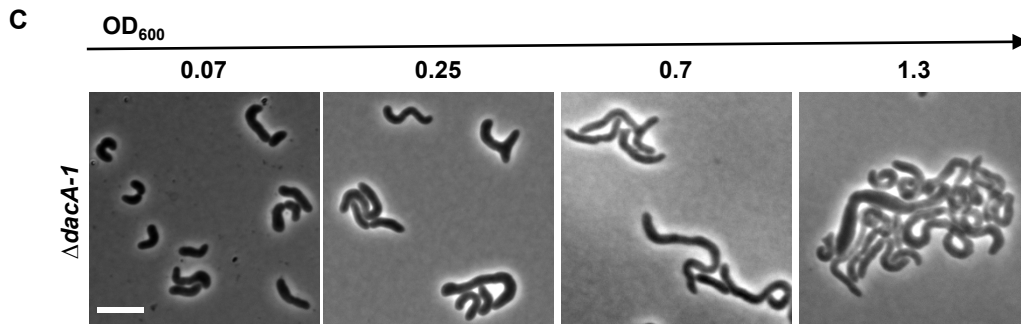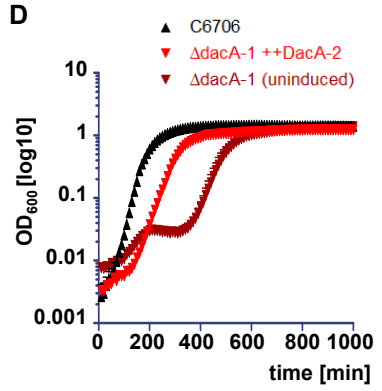

**A**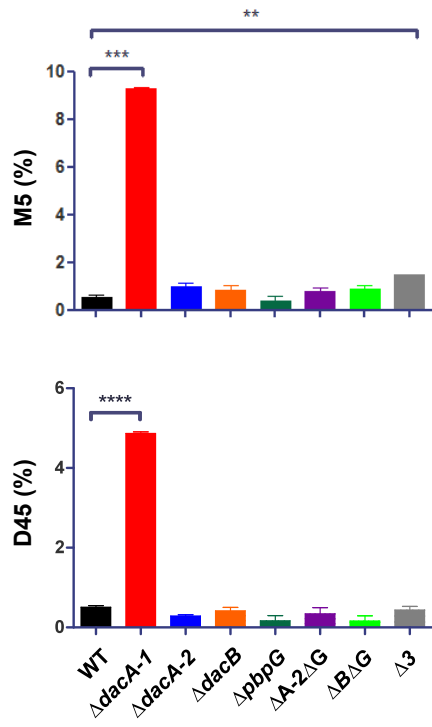**B**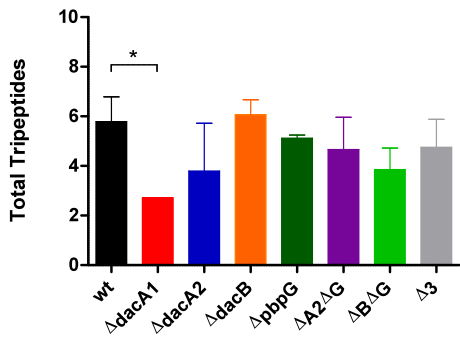**C**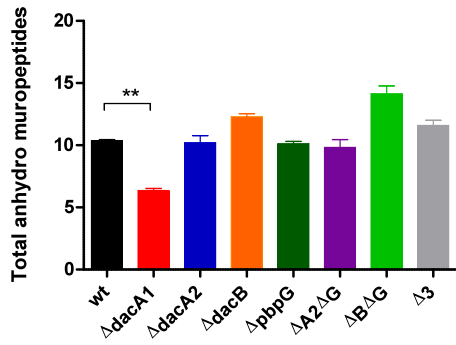



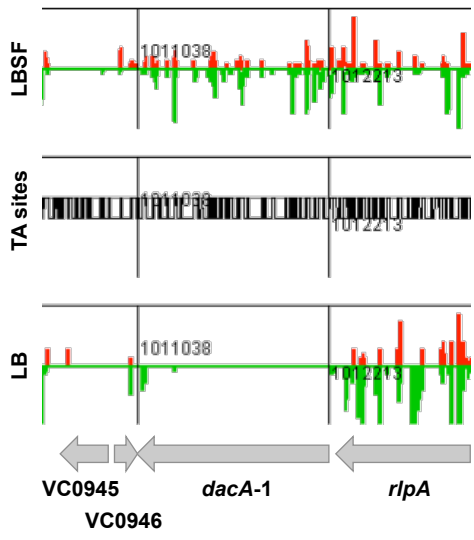

A

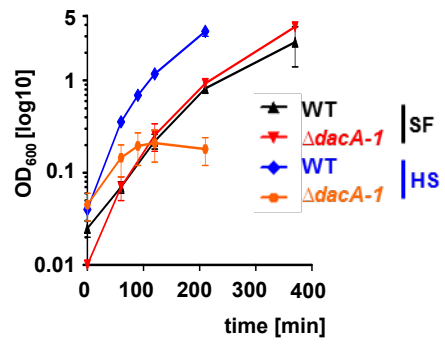

B

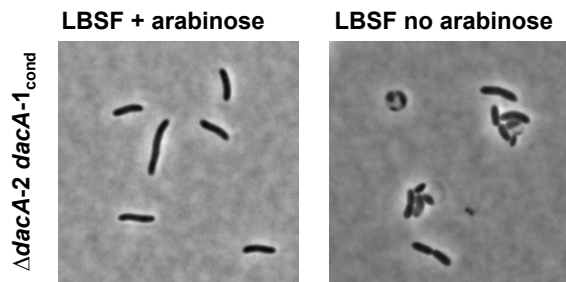

## References

- Cameron, D.E., Urbach, J.M., and Mekalanos, J.J. (2008) A defined transposon mutant library and its use in identifying motility genes in *Vibrio cholerae*. *Proceedings of the National Academy of Sciences* **105**: 8736–8741.
- Ferrieres, L., Hemery, G., Nham, T., Guerout, A.M., Mazel, D., Beloin, C., and Ghigo, J.M. (2010) Silent Mischief: Bacteriophage Mu Insertions Contaminate Products of *Escherichia coli* Random Mutagenesis Performed Using Suicidal Transposon Delivery Plasmids Mobilized by Broad-Host-Range RP4 Conjugative Machinery. *J. Bacteriol.* **192**: 6418–6427.
- Glauner, B. (1988) Separation and quantification of mucopeptides with high-performance liquid chromatography. *Anal Biochem* **172**: 451–464.
- Guzman, L.M., Belin, D., Carson, M.J., and Beckwith, J. (1995) Tight regulation, modulation, and high-level expression by vectors containing the arabinose PBAD promoter. *J. Bacteriol.* **177**: 4121–4130.
- Kolter, R., Inuzuka, M., and Helinski, D.R. (1978) Trans-complementation-dependent replication of a low molecular weight origin fragment from plasmid R6K. *Cell* **15**: 1199–1208.
- Philippe, N., Alcaraz, J.-P., Coursange, E., Geiselmann, J., and Schneider, D. (2004) Improvement of pCVD442, a suicide plasmid for gene allele exchange in bacteria. *Plasmid* **51**: 246–255.
- Simon, R., Prierer, U., and Pühler, A. (1983) A Broad Host Range Mobilization System for In Vivo Genetic Engineering: Transposon Mutagenesis in Gram Negative Bacteria. *Nat. Biotechnol.* **1**: 784–791.
- Thelin, K.H. and Taylor, R.K. (1996) Toxin-coregulated pilus, but not mannose-sensitive hemagglutinin, is required for colonization by *Vibrio cholerae* O1 El Tor biotype and O139

strains. *Infect. Immun.* **64**: 2853–2856.
